# Supplementary material for: Metabolism in the Niche: a Large-Scale Genome-Based Survey Reveals Inositol Utilization To Be Widespread among Soil, Commensal, and Pathogenic Bacteria
Source: PubMed Central journal article supplement (PMC9430895; doi:10.1128/spectrum.02013-22), 2022-08-04
Supplement: spectrum.02013-22-s0001.pdf [file spectrum.02013-22-s0001.pdf]

## **Additional files**

**FIG. S1: IolCatGC-positive genomes per species.** The dot plot indicates the relative prevalence of *iol* gene-positive genomes belonging to the same species (left). The total number of genomes available for one species is given in a logarithmic scale. For most species, one representative genome sequence only was found in the databases (relative prevalence = 1). The colors indicated the phylum to which a genome sequence set belongs to (right). The plot was generated with the help of R package ggplot2 (3.3.2).

**Table S1: Functions encoded by *iol* genes**

**xlsx-files:**

**Table S2: Summary table with representative species**

**Table S3: IolCatGC-positive species**

**Table S4: Values Sankey diagram**

**Table S5: Bacterial phyla overview of IolCatGC-positive species**

**Table S6: IolCatGC-positive species in bacterial genera**

**Table S7: Pathogenic bacteria harbouring IolCatGC**

**Table S8: Gut commensals harbouring IolCatGC**

**Table S9: Archaea with Iol protein homologs**

**FIG. S1: lolCatGC-positive genomes per species.**

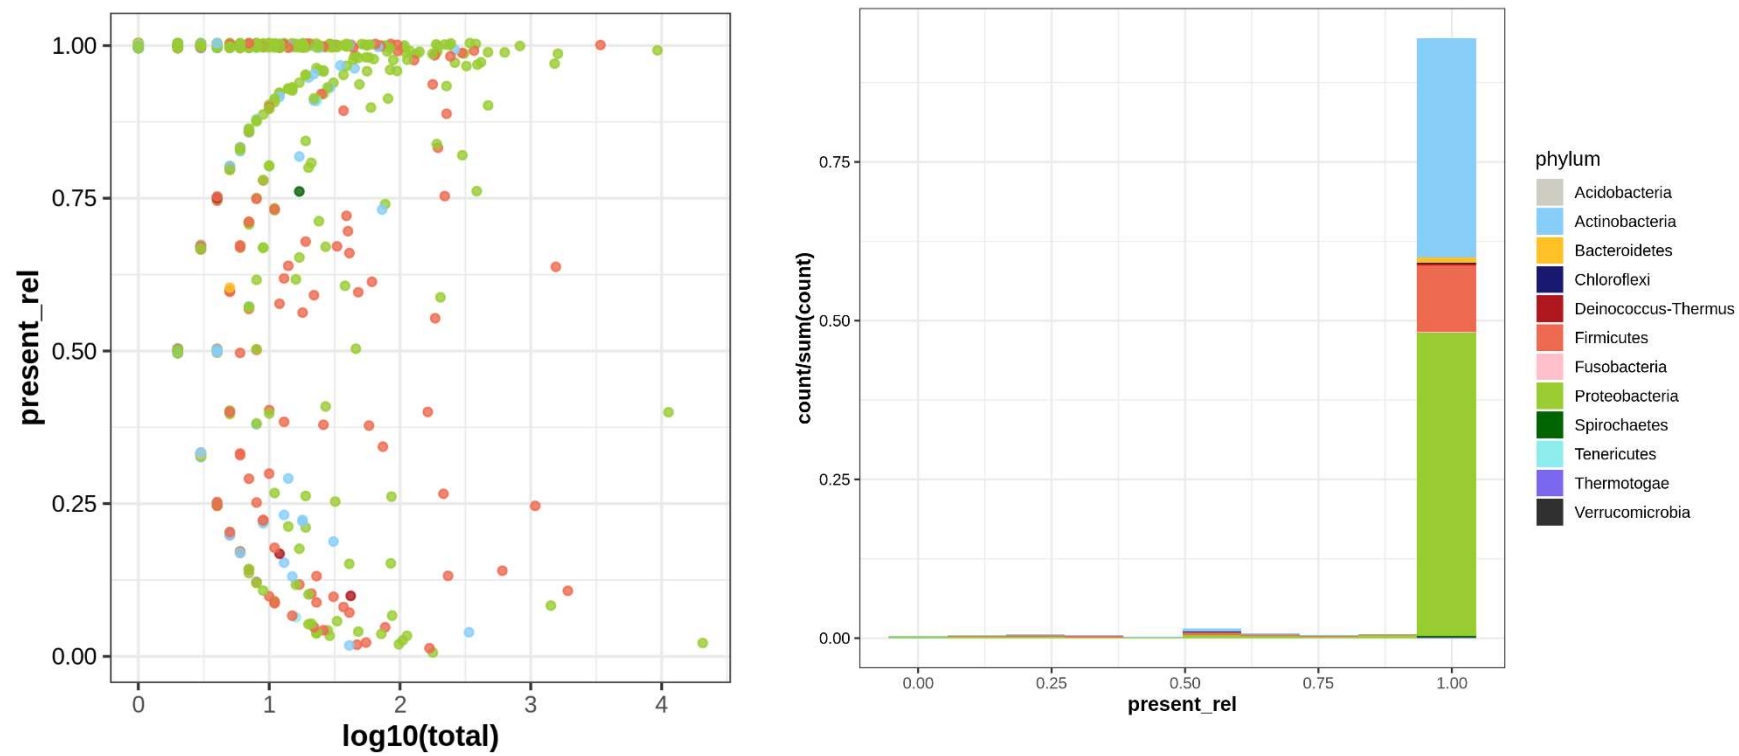

**Table S1: Proteins and functions encoded by *iol* gene cluster**

| Gene         | Protein                                              | Function                                                                                       | Literature |
|--------------|------------------------------------------------------|------------------------------------------------------------------------------------------------|------------|
| <i>iolA</i>  | Malonate-semialdehyde dehydrogenase                  | Conversion of malonic semialdehyde (MSA) to acetyl-CoA + CO <sub>2</sub>                       | [1]        |
| <i>iolB</i>  | Isomerase                                            | Isomerisation of 5-deoxy-D-glucuronic acid to 2-deoxy-5-keto-D-gluconic acid (DKG)             | [1]        |
| <i>iolC</i>  | 5-dehydro-2-deoxygluconokinase                       | Phosphorylation of DKG to DKG 6-phosphate                                                      | [1]        |
| <i>iolD</i>  | 3D-(3,5/4)-trihydroxycyclohexane-1,2-dione hydrolase | Hydrolysis of 3D-(3,5/4)-trihydroxycyclohexane-1,2-dione (THcHDO) to 5-deoxy-D-glucuronic acid | [1]        |
| <i>iolE</i>  | Dehydratase                                          | Dehydration of 2-keto-MI (2KMI) to THcHDO                                                      | [2]        |
| <i>iolG1</i> | Inositol-dehydrogenase                               | Oxidation of MI to 2KMI                                                                        | [1]        |
| <i>iolG2</i> | D-chiro-inositol-2-dehydrogenase                     | Oxidation of D-chiro-inositol to 1-keto-D-chiro-inositol                                       | -          |
| <i>iolH</i>  | Isomerase/dehydratase                                | Unknown                                                                                        | [1]        |
| <i>iolI1</i> | Isomerase                                            | Interconverts 2KMI and 1-keto-D-chiro-inositol                                                 | [1]        |
| <i>iolJ</i>  | Fructose-1,6-biphosphate aldolase                    | Cleavage of DKGP into dihydroxyaceton-phosphate and MSA                                        | [1]        |
| <i>iolR</i>  | Transcriptional regulator                            | Repressor of <i>iol</i> genes                                                                  | [3, 4]     |
| <i>iolS</i>  | Pyridoxal reductase                                  | Unknown                                                                                        | [1]        |
| <i>iolT1</i> | Permease                                             | Uptake of MI                                                                                   | [5, 6]     |
| <i>iolT2</i> | Permease                                             | Uptake of MI                                                                                   | [5]        |
| <i>iolU</i>  | Scyllo-inositol dehydrogenase                        | Dehydrogenation of scyllo-inositol to 2KMI                                                     | [7]        |
| <i>iolW</i>  | Scyllo-inositol dehydrogenase                        | Dehydrogenation of scyllo-inositol to 2KMI                                                     | [8]        |
| <i>iolX</i>  | Scyllo-inositol dehydrogenase                        | Dehydrogenation of scyllo-inositol to 2KMI                                                     | [8]        |
| <i>reiD</i>  | Transcriptional regulator                            | Activation of P <sub><i>iolEG1</i></sub>                                                       | [9]        |
| <i>strfJ</i> | putative lysosomale glykosylceramidase               | Unknown, induced by SsrB                                                                       | [10]       |

## References:

1. Yoshida K, Yamaguchi M, Morinaga T, Kinehara M, Ikeuchi M, Ashida H *et al.* *myo*-Inositol catabolism in *Bacillus subtilis*. *J Biol Chem* 2008; 283:10415-10424.
2. Yoshida K, Yamaguchi M, Ikeda H, Omae K, Tsurusaki K, Fujita Y. The fifth gene of the *iol* operon of *Bacillus subtilis*, *iolE*, encodes 2-keto-*myo*-inositol dehydratase. *Microbiology* 2004; 150:571-580.
3. Yoshida KI, Shibayama T, Aoyama D, Fujita Y. Interaction of a repressor and its binding sites for regulation of the *Bacillus subtilis iol* divergon. *J Mol Biol* 1999; 285:917-929.
4. Kröger C, Fuchs TM. Characterization of the *myo*-inositol utilization island of *Salmonella enterica* serovar Typhimurium. *J Bacteriol* 2009; 191:545-554.
5. Yoshida K, Yamamoto Y, Omae K, Yamamoto M, Fujita Y. Identification of two *myo*-inositol transporter genes of *Bacillus subtilis*. *J Bacteriol* 2002; 184:983-991.
6. Kröger C, Stolz J, Fuchs TM. *myo*-Inositol transport by *Salmonella enterica* serovar Typhimurium. *Microbiology* 2010; 156:128-138.
7. Kang DM, Tanaka K, Takenaka S, Ishikawa S, Yoshida KI. *Bacillus subtilis iolU* encodes an additional NADP(+)-dependent scyllo-inositol dehydrogenase. *Biosci Biotechnol Biochem* 2017; 81:1026-1032.
8. Morinaga T, Ashida H, Yoshida KI. Identification of two *scyllo*-inositol dehydrogenases in *Bacillus subtilis*. *Microbiology* 2010; 156:1538-1546.
9. Rothhardt JE, Kröger C, Broadley SP, Fuchs TM. The orphan regulator *ReiD* of *Salmonella enterica* is essential for *myo*-inositol utilization. *Mol Microbiol* 2014; 94:700-712.
10. Worley MJ, Ching KH, Heffron F. *Salmonella* *SsrB* activates a global regulon of horizontally acquired genes. *Mol Microbiol* 2000; 36:749-761.
